# Supplementary material for: Angiomotin links ROCK and YAP signaling in mechanosensitive differentiation of neural stem cells
Source: PubMed Central journal article supplement — Mol Biol Cell. 2020 Mar 1;31(5):386–96. doi: 10.1091/mbc.E19-11-0602 (PMC7183791; doi:10.1091/mbc.e19-11-0602), 2020-03-01

# Supplemental Materials

*Molecular Biology of the Cell*

Kang et al.

## Supplementary figures:

### **Figure S1. Stiffness does not impact cellular density during differentiation.**

Representative brightfield microscopy images depicting NSC populations at various timepoints of differentiation on soft (0.5 kPa) or stiff (73 kPa) substrates. Cells were cultured in mixed differentiation conditions (1% FBS + 1  $\mu$ M retinoic acid) starting on day 0. Bar = 100  $\mu$ m.

**Figure S2. Loss or overexpression of AMOT does not affect NSC proliferative capacity.** (A) Representative immunofluorescence images of DAPI (blue) and EdU (red) after 4 hours of EdU incubation and 48 hours of culture in growth conditions (20 ng/mL FGF-2) for various AMOT knockdown, knockout, and overexpression cell lines. (B) Quantification of the EdU+% subpopulation in all cell lines, calculated as EdU+/DAPI+.

Supplementary figures:

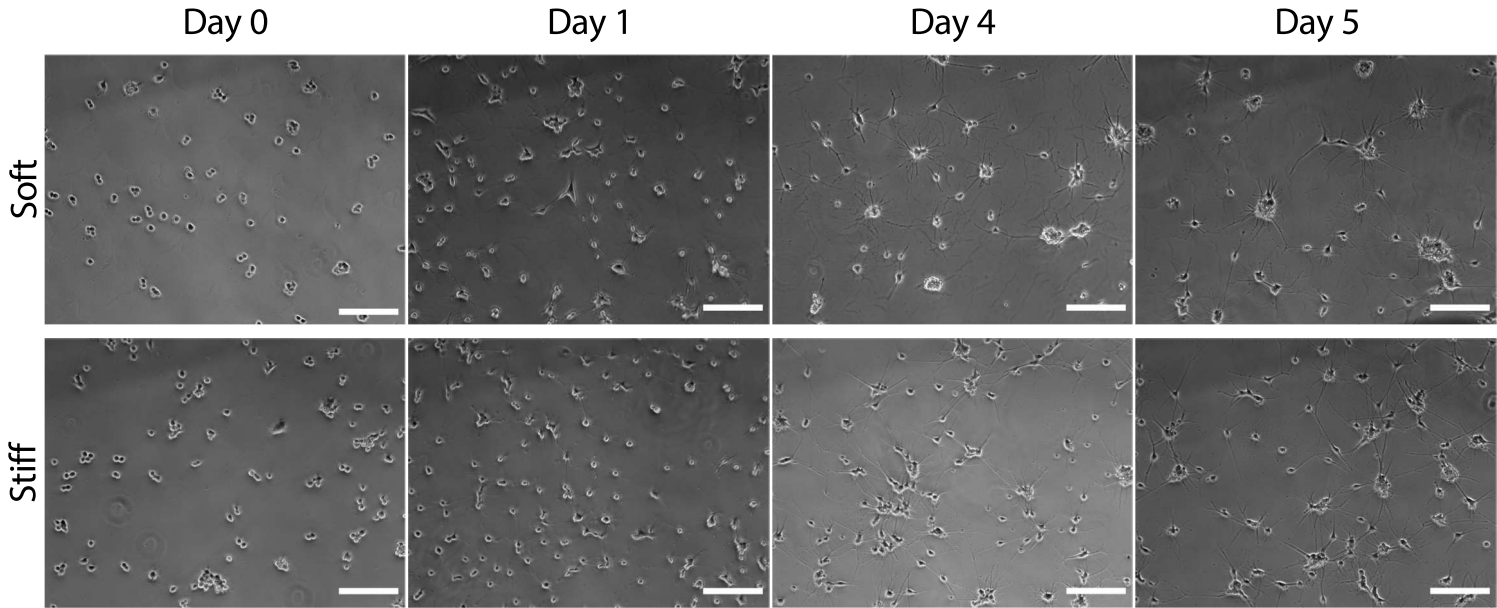

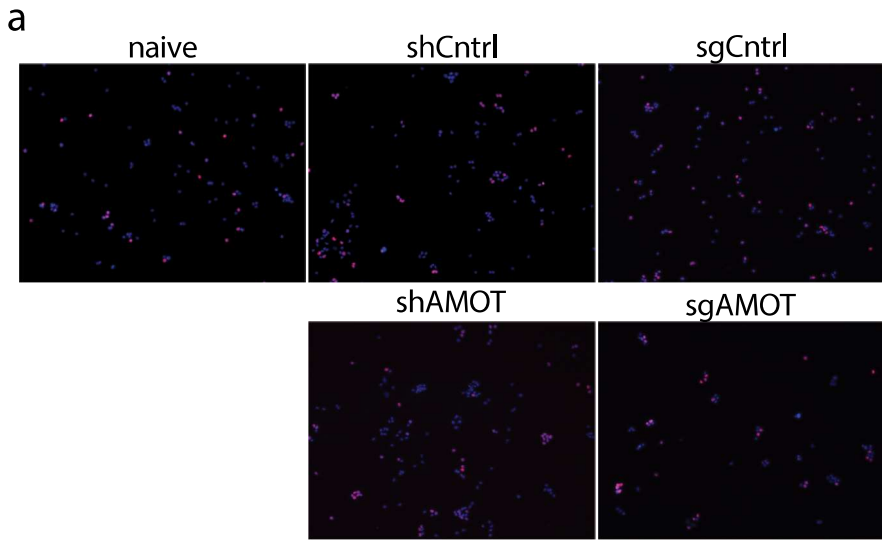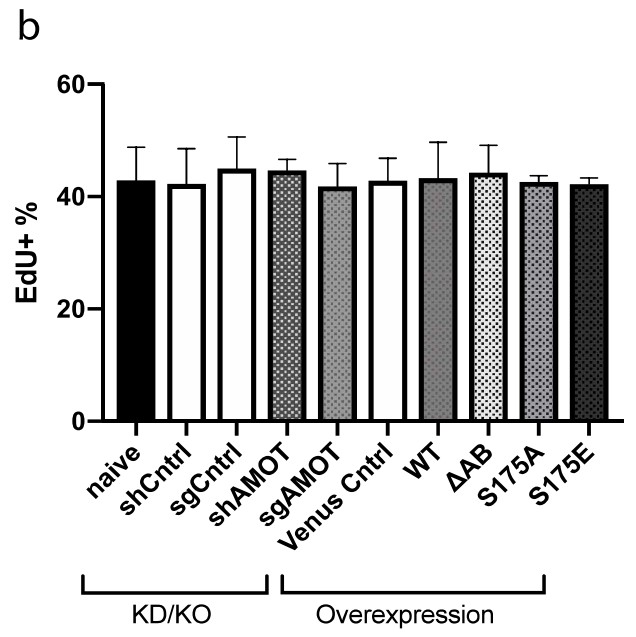

Supplement: mbc-31-386-s001.pdf [file mbc-31-386-s001.pdf]
